CORRECTION

# Correction: Burden of Illness in UK Subjects with Reported Respiratory Infections Vaccinated or Unvaccinated against Influenza: A Retrospective Observational Study

The *PLOS ONE* Staff

There is an error in the Funding section. The publisher apologizes for the error. The correct Funding information is as follows: This work was supported by GlaxoSmithKline Biologicals SA, which was involved in all stages of the study conduct and analysis and also funded preparation of the manuscript and page charges. All authors had full access to the data and agreed with the submission of the publication.

The Supporting Information files have been corrected to remove track changes markup. Please view the correct Supporting Information files here.

## Supporting Information

**S1 File. READ codes and ICD-10 codes.**  
(DOCX)

**S1 Table. Absolute values for resource use and cost in low-risk and high-risk patients.**  
(DOC)

**S2 Table. Resource use and cost in low-risk patients, inpatient admissions by route.**  
(DOC)

**S3 Table. Resource use and cost in high-risk patients, inpatient admissions by route.**  
(DOC)

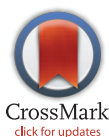

CrossMark  
click for updates

## OPEN ACCESS

**Citation:** The *PLOS ONE* Staff (2015) Correction: Burden of Illness in UK Subjects with Reported Respiratory Infections Vaccinated or Unvaccinated against Influenza: A Retrospective Observational Study. *PLoS ONE* 10(10): e0140719. doi:10.1371/journal.pone.0140719

**Published:** October 9, 2015

**Copyright:** © 2015 The PLOS ONE Staff. This is an open access article distributed under the terms of the [Creative Commons Attribution License](https://creativecommons.org/licenses/by/4.0/), which permits unrestricted use, distribution, and reproduction in any medium, provided the original author and source are credited.

## Reference

1. Pockett RD, Watkins J, McEwan P, Meier G (2015) Burden of Illness in UK Subjects with Reported Respiratory Infections Vaccinated or Unvaccinated against Influenza: A Retrospective Observational Study. *PLoS ONE* 10(8): e0134928. doi:10.1371/journal.pone.0134928 PMID: 26287532
